# Supplementary material for: Gut bacterial ClpB-like gene function is associated with decreased body weight and a characteristic microbiota profile
Source: PubMed Central journal article supplement (PMC7193372; doi:10.1186/s40168-020-00837-6), 2020-04-30
Supplement: 40168_2020_837_MOESM2_ESM.pdf [file 40168_2020_837_MOESM2_ESM.pdf]

|                         |                                                                      |     |
|-------------------------|----------------------------------------------------------------------|-----|
| alphaMSH.IRM-001        | .....RW.GKPV.....                                                    | 6   |
| Ecoli-ClpB.IRM-001      | ATQ...LEGKTMRLLRNKVTDAAEIAEVLARWTGIPVSRMMESEREKLLRMEQELHHRVIGQNEAVD  | 578 |
| contig 11902.IRM-001 1  | TQKQLHEMQGD.KAMIKKEEVDAEDIADVSRWTGIPVSKMLQSEKDQLLQLEAELHHRVIGQ....   | 407 |
| contig 20018.IRM-001 1  | .....EIANVISMMSGIPVQRMAQAEGIKLAGMKEDLQSKVIAQDTAIE                    | 44  |
| contig 25392.IRM-001 1  | TQKKLRDMQGD.KAMIKKEEVDAEDIADVSRWTGIPVSKMLQSEKDQLLHLEEELHQRVIGQDEAIE  | 102 |
| contig 29383.IRM-001 1  | .....SQALGEKDVRDEIAEVVSRATGIPVSKMMQGERQKLLHMDEALSKRVVGGDQAVR         | 86  |
| contig 32308.IRM-001 6  | TQKQLRDMQGD.KAMIKKEEVDAEDIADVSRWTGIPVSKMLQSEKDQLLHLEEELHQRVIGQDEAIE  | 576 |
| contig 35309.IRM-001 33 | IQEDLKHKQGD.SAMIKKEEVTAEDIADVSRWTGIPVSKMLQSERDKLLHLEQELHLRVVGGQDEAIA | 576 |
| contig 48006.IRM-001 1  | AEAKAK.KDGSDDSLVHENVTEEEIAKIIISRWGTGIPVAKLSESE.....                  | 49  |
| contig 55266.IRM-001 1  | .....VKKEDLSLVHESVTEDEIARIVSKWTGIPVAKLTESERSKTLHLDQVLHHRVVGQDEGVE    | 60  |
| contig 68680.IRM-001 1  | ANESAEDKD...NKLLRRTKVTETEEIAMIVGRWTGIPVSKLMESE.....                  | 50  |
| contig 73341.IRM-001 1  | .....EDEIAKIIISRWGTGIPVAKLTESERNKTLHLDKILHERVVGQDEAVE                | 46  |
| seq 66415.IRM-001 1     | VKKKLADMKHG.ESLIRREEVTSDDIAAVVSKWTGIPVNRMMQSERMKLLHLEEELHKR.....     | 77  |
| seq 135437.IRM-001 1    | EERNTKE...SDNRLVHEAVTDEIAKIIISRWGTGIPVTRLTEGERTKLLSLEDELHHRVIGQDE... | 86  |
| seq 160587.IRM-001 1    | .....TQDLSLVHESVTEDEIARIISRWGTGIPVSKLNESESKILH.....                  | 41  |
| seq 168518.IRM-001 1    | .....PKLLRRTSVGAEEIAEVVSRATGIPVSKMMQGERQKLLHMDEALSKRVVGGDQAVR        | 79  |
| seq 284160.IRM-001 1    | .....EVSDDDIADVSRWTGIPVSKMMQSEKDQLLRLSELHTRVIGQEEAIN                 | 49  |
| seq 327988.IRM-001 1    | ANESAEDKD...NKLLRRTKVTETEEIAMIVGRWTGIPVSKLMESEKLLDLKILHK.....        | 57  |
| seq 357381.IRM-001 1    | .....WTGIPVSRMLASEREKLLHMEELHRRVVGQDLAIA                             | 36  |
| seq 446578.IRM-001 1    | NQKKQ.....NE..IPELTTEDAAEVVSLWTQIPVTHLTKGDMERLRHLEKE.....            | 52  |
| seq 607059.IRM-001 1    | EERNTKE...SDNRLVHEAVTDEIAKIIISRWGTGIPVTRLTEG.....                    | 49  |
| seq 671420.IRM-001 1    | .....DEEIARIVARWTGIPVSKLMEGEREKLLHLEDILHQRVIGQDEAVT                  | 46  |
| seq 724706.IRM-001 1    | .....ADEIADIVSKWTGIPVSKLAETEKEKILNLENTLKDRVKGQDEAVR                  | 46  |
| seq 1511914.IRM-001 1   | .....PKLLRRTSVGAEEIAEVVSRATGIPVSKMMQGERQKL.....                      | 50  |
| seq 1542764.IRM-001 1   | .....SVTDEEIARIVSRWTGIPVAKLNESESKTLHLADELH.....                      | 38  |
| seq 1849904.IRM-001 1   | .....VHENVTEEEIAKIIISRWGTGIPVAKLSESEKTLNLDLHHRVVGQDE...              | 49  |

logo

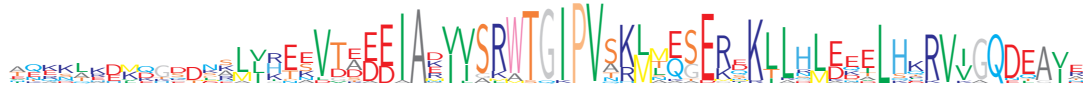

- X Asp, Glu
- X Arg, Lys, His
- X Phe, Tyr, Trp
- X Ala, Gly
- X Cys, Met
- X Ser, Thr
- X Asn, Gln
- X Leu, Val, Ile
- X Pro

|                          |                                                                      |     |
|--------------------------|----------------------------------------------------------------------|-----|
| alphaMSH.IRM-030         | .....RW.GKPV.....                                                    | 6   |
| Ecoli-ClpB.IRM-030       | ATQLE...GKTMRLLRNKVTDAEIAEVLARWTGIPVSRMMESEREKLLRMEQELHHRVIGQNEAVD   | 578 |
| contig 027087.IRM-030 1  | .....S.TQGAAMVREEVTTADDIAEVVSRWTGIPVNRMMQSEREKLLHLEELHHRVIGQDEAIT    | 60  |
| contig 042720.IRM-030 1  | KQAAAS.....EIKVNMDDVAKVIELWTGIPAVKIQETEFVKLAGLEAELKKKIIGQDE...       | 66  |
| contig 051406.IRM-030 1  | .....IADVSRWTGIPVSKMLQSEKDKLLHLEELHQRVIGQDEAIE                       | 43  |
| contig 052055.IRM-030 1  | ATQLE...GKTMRLLRNKVTDAEIAEVLARWTGIPVSRMMESEREKLLRMEQELHHRVIGQNEAVD   | 333 |
| contig 056378.IRM-030 1  | EEKLANE..KKEDSLLRDRVTDEEIIARIVARWTGIPVEKLVGEREKLLHLLDDVLHHRVIGQDEAVT | 271 |
| contig 073530.IRM-030 1  | IQEDLKH.KQGDSAMIKKEEVTAEIADVSRWTGIPVSKMLQSERDKLLHLEELHHRVIGQDEAIA    | 138 |
| contig 078180.IRM-030 5  | IQEDLKK.KQGDSALIKKEEVTAEIADVSRWTGIPVSKMLQSEREKLLHLEELHHRVIGQDEAIE    | 282 |
| contig 089518.IRM-030 1  | .....EVDAEDIADVSRWTGIPVSKMLQSEKDKLLHLEELHQRVIGQNEAIE                 | 49  |
| contig 089527.IRM-030 1  | .....DEIARIISRWTGIPVARLTEGERTKLLHLEELHHRVIGQDEGVR                    | 45  |
| contig 106900.IRM-030 13 | IQEDLKK.KQGDNAMIKKEEVTAEIADVSRWTGIPVSKMLQSERDKLLHLEELHHRVIGQDEAIE    | 576 |
| contig 109347.IRM-030 1  | IQEDLKH.KQGDNAMIKKEEVTAEIADVSRWTGIPVSKMLQSERDKLLNLEELHHRVIGQEEAIA    | 480 |
| contig 112201.IRM-030 1  | .....MIKEEVDAEDIADVSRWTGIPVSKMLQSEKDKLLHLEELHQRVIGQDEAIE             | 53  |
| contig 116309.IRM-030 1  | EEERIR...NEDLSLVRESVSEDEIARIVSKWTGIPVAKLTESERSKTLHLDEVLH.....        | 67  |
| contig 128765.IRM-030 1  | .....SLVHENVSEEEIARIISRWTGIPVAKLTESERNKTLHLDEELHHRVIGQDEGVT          | 54  |
| contig 132098.IRM-030 1  | EEKIAAA..KKEDSLLRDRVTDEEIIARIVARWTGIPVEKLVGEREKLLHLLDDVLHHRVIGQDEAVT | 223 |
| contig 140756.IRM-030 1  | EEKSVK...ESDRSLVHEAVTDDEIARIISRWTGIPVTRLTEGERAKLLTLEDQLHHRVIGQDEGVK  | 189 |
| seq 15151.IRM-030 1      | SEAALEAQKQDGEGLNEQVTSAEIAEVVSAWTGVPVSKMMQGELEDKLGLEGEELHHRVIGQDEAVS  | 68  |
| seq 75264.IRM-030 1      | .....KQGDSALIKKEEVTAEICADVSRWTGIP.....                               | 76  |
| seq 143176.IRM-030 1     | .....DDVAKVIELWTGIPAVKIRETEFVKLAGLEAALKQKVIIGQDEAVH                  | 45  |
| seq 163948.IRM-030 1     | KQAAAG.....EIQVTMDDVAKVIELWTGIPAVKIRETEYAKLASLEAELKKKIIGQDDA..       | 91  |
| seq 321549.IRM-030 1     | ....LKT.MQGASAMIKKEEVDSEDIADVSRWTGIPVSKMMQSEKDKLLHLESELHTRVIGQEEAIS  | 62  |
| seq 436330.IRM-030 1     | .....LRDRVTDEEIIARIVARWTGIPVEKLVGEREKLLHLLDDVLHQ.....                | 42  |
| seq 501661.IRM-030 1     | VKEKLT.MQGASAMIKKEEVDSEDIADVSRWTGIPVSKMMQSEKDKLLHLESELHTRVI.....     | 79  |
| seq 701163.IRM-030 1     | ....KK.KQGDSALIKDEVTAEDIADVSRWTGIPVSKMLQSERENLLH.....                | 74  |
| seq 845795.IRM-030 1     | ...SKKDENGNDNVMLKKEEVDEEDIKVVSTWTAIPVARLGTGARAKLVHLEELHEHVIIGQDEAVK  | 64  |
| seq 878766.IRM-030 1     | .....VDAEDVAEVVSRWTGIPVSRMLASEREKLLHMEELHHRVIGQDLAIA                 | 48  |
| seq 966940.IRM-030 1     | VKKKLAD.MKHGESLIREEVTSDDIAAVVSIWTGIPVNRMMQSVRTKLLHLEELHHRVIGQDEAVIA  | 75  |
| seq 1035782.IRM-030 1    | IQDQLKD.TQGGDAMIKKEEVTSAEDIADVSRWTGIPVSKMLQS.....                    | 74  |

logo

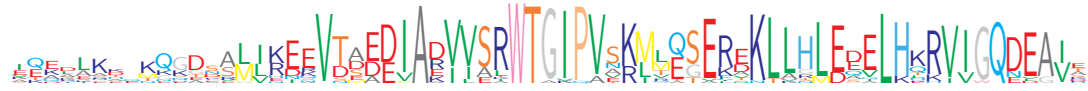

- Asp, Glu
- Arg, Lys, His
- Phe, Tyr, Trp
- Ala, Gly
- Cys, Met
- Ser, Thr
- Asn, Gln
- Leu, Val, Ile
- Pro

|                         |                                                                        |     |
|-------------------------|------------------------------------------------------------------------|-----|
| alphaMSH.IRM-143        | .....RW.GKPV.....                                                      | 6   |
| Ecoli-ClpB.IRM-143      | ...TQL..EGKTMRLLRNKVTDAAEIVLARWTGIPVSRMMESEREKLLRMEQELHHRVIGQNEAVD     | 578 |
| contig 000421.IRM-143 1 | ..QEQLKSTQGGAAAMVREEVTADDIAEIVSRWTGIPVSRMMQSEREKLLHLEELHKRVIQDEAIT     | 190 |
| contig 005972.IRM-143 1 | .....EEEEIARIISRWTGIPVAKLTESERNKTLHLDEELHKRVIQEDGVR                    | 46  |
| contig 014647.IRM-143 1 | ..EKSV..KESDRSLVHEAVTDDEIARIISRWTGIPVTRLTEGERAKLLTLEDQLHKRVVGGDEGVK    | 164 |
| contig 023387.IRM-143 1 | ..EEEV..KNKDLSLVHENVSEEEIARIISRWTGIPVAKLTESERNKTLHLDEELHKR.....        | 73  |
| contig 030035.IRM-143 1 | ..EANNKNDKENVLLKKEEVEDDEISKVSVTWTGIPVSRLLSGGEREKLVHLEDILHQRVVGQDDAVK   | 111 |
| contig 033429.IRM-143 1 | ..EAKVK..AKDLSLVHESVTDDEIAKIVSRWTGIPVAKLTESERNKTLHLADELHKRVIQDEGVE     | 129 |
| contig 034881.IRM-143 1 | ..EAKVK..AKDLSLVHESVTDDEIAKIVSRWTGIPVAKLTESERNKTLHLADELHKRVIQDEGVE     | 179 |
| contig 037029.IRM-143 1 | ..EKIAAAKKEDSLLRDRVTDEEIARIVARWTGIPVEKLVGEREKLLHLDDVLHQRVIGQDEAVT      | 68  |
| contig 044192.IRM-143 1 | ..EEKAEKSKTKNTLLRDKVTEEEIARIICRWTGIPVAKLM.....                         | 147 |
| contig 044771.IRM-143 3 | .....ARLVARWTGIPVEKLVGEREKLLHLDDVLHKRVIQDEAVT                          | 42  |
| contig 063398.IRM-143 1 | .....VHDRVTDEEIARIISRWTGIPVAKLTESERTKILHLDDDELHKRVIQEDGVR              | 52  |
| contig 064112.IRM-143 1 | QLERELPAKQ..AAAGEIQVTMDDVAKVIELWTGIPAVKIRETEYAKLASLETE.....            | 64  |
| contig 066288.IRM-143 1 | ..EKLAEPPQSSLLRDKVTEEEIARIIERWTGIPVANLMEGEREKLLHLEDILHQRVVGQDEAVR      | 75  |
| contig 067406.IRM-143 1 | ....KIAAAKKEDSLLRDRVTDEEIARIVARWTGIPVEKLVGEREKLLHLDDVL.....            | 51  |
| contig 070189.IRM-143 1 | ..QDEFRAASASGAMLKEEVDAEDVAEVSRTWTGIPVSRM.....                          | 149 |
| contig 074292.IRM-143 1 | ..QEDLKKKQGDNAMIKKEEVTAEADIADVSRWTGIPVSKMLQSERDKLLHLEDELHKRVIQDEAIE    | 68  |
| contig 081234.IRM-143 1 | ..EA...KESDDALLQEKVTVDNVSEVISRWTGIPMNKLMASEREKLLALDDTLKVRVIGQDDA..     | 61  |
| contig 082643.IRM-143 1 | ..EALL..KDRDLSLVRENVGDEEIALIISRWTGIPVAKLTESERNKTLHLDEELHKRVIQDDGVT     | 377 |
| contig 088472.IRM-143 1 | ..EEEV..KNKDLSLVHENVSEEEIARIISRWTGIPVAKLTESERNKTLHLDEELHKRVIQDEGVT     | 86  |
| contig 096522.IRM-143 1 | ..EAKAKKDGSDDSLHENVTEEEIAKIIISRWTGIPVAKLSESERQKTLNLDETLHKRVVGGDEAVT    | 89  |
| contig 102803.IRM-143 1 | ..EEKV..KNEDLSLVHESVTDDEIARIISRWTGIPVAKLTESERNKTLHLDEELHKRVIQDE...     | 149 |
| contig 102892.IRM-143 1 | ..QEDLKHKQGD SAMIKKEEVTAEADIADVSRWTGIPVSKMLQSERDKLLHLEDELHRLRVVGGDE... | 128 |
| contig 104853.IRM-143 1 | ..EKKS..SNRDMSLVHESVTEEEIAKIIISRWTGIPVSKLSESERQKTLNLDEQLHKRVIGQDEGVT   | 79  |
| contig 118208.IRM-143 1 | ELEKQTKKAQREIRRKNLSVTEDDVADVSGWTKIPVKKLAEGEAARLKKLEATLHKRVVGGQEEAVT    | 234 |
| contig 119346.IRM-143 1 | .....IISRWTGIPVAKLTETEREKTLHLDKQLHKRVIGQDEAVT                          | 40  |
| contig 128138.IRM-143 1 | .....HKQGDNAMIKKEEVTAEADIADVSRWTGIPVSKMLQSERDKLLNLEQELHRLRVVGGQEEAIA   | 60  |
| contig 129621.IRM-143 1 | SLERKMKNRQKQKQ.NEIPELTTEDAAEVSLSWTQIPVTLTKGDMERLRHLEKELHKKHVIGQDEAVN   | 74  |
| contig 131246.IRM-143 1 | ALEAQK...QQDGEGLNEQVTSDEIAEIVSAWTGVPVSKMMQGEKLDKLGLEGELHKRVIQDEAVS     | 167 |

logo

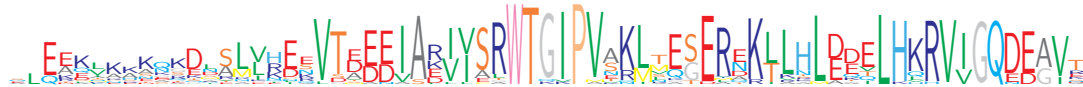

- X Asp, Glu
- X Arg, Lys, His
- X Phe, Tyr, Trp
- X Ala, Gly
- X Cys, Met
- X Ser, Thr
- X Asn, Gln
- X Leu, Val, Ile
- X Pro
